# Supplementary material for: Associations of Sleep Quality and Frailty among the Older Adults with Chronic Disease in China: The Mediation Effect of Psychological Distress
Source: PubMed Central journal article supplement (PMC7400303; doi:10.3390/ijerph17145240), 2020-07-20
Supplement: ijerph-17-05240-s001.pdf [file ijerph-17-05240-s001.pdf]

## Sensitivity Analysis

Table S1 Model estimation using categorical K10 vs continuous K10

| Predictors                     | Coeff | p-value | 95% CI    |
|--------------------------------|-------|---------|-----------|
| Sleep quality<br>PSQI<7 (ref.) |       |         |           |
| PSQI $\geq$ 7                  | 1.27  | <0.001  | 1.11-1.42 |
| Estimation on continuous K10   |       |         |           |
| Sleep quality<br>PSQI<7 (ref.) |       |         |           |
| PSQI $\geq$ 7                  | 0.53  | <0.001  | 0.47-0.60 |

Table S2 Model estimation using categorical K10 vs continuous K10

| Predictors                          | Model with mediators |         |           | Model without mediators |         |           |
|-------------------------------------|----------------------|---------|-----------|-------------------------|---------|-----------|
|                                     | OR                   | p-value | 95% CI    | OR                      | p-value | 95% CI    |
| Sleep quality<br>PSQI<7 (ref.)      |                      |         |           |                         |         |           |
| PSQI $\geq$ 7                       | 1.44                 | <0.001  | 1.19-1.76 | 1.84                    | <0.001  | 1.53-2.23 |
| Psychological distress<br>No (ref.) |                      |         |           |                         |         |           |
| Mild                                | 1.63                 | <0.001  | 1.29-2.05 |                         |         |           |
| Moderate                            | 2.34                 | <0.001  | 1.81-3.02 |                         |         |           |
| Severe                              | 4.43                 | <0.001  | 3.15-6.22 |                         |         |           |
| Estimation with continuous K10      |                      |         |           |                         |         |           |
| Sleep quality<br>PSQI<7 (ref.)      |                      |         |           |                         |         |           |
| PSQI $\geq$ 7                       | 1.37                 | <0.001  | 1.16-1.62 | 1.84                    | <0.001  | 1.53-2.23 |
| Psychological distress              | 1.07                 | <0.001  | 1.06-1.09 |                         |         |           |
